# Supplementary material
Source: PubMed Central journal article supplement (PMC7550218)

# Supplemental Figure 1

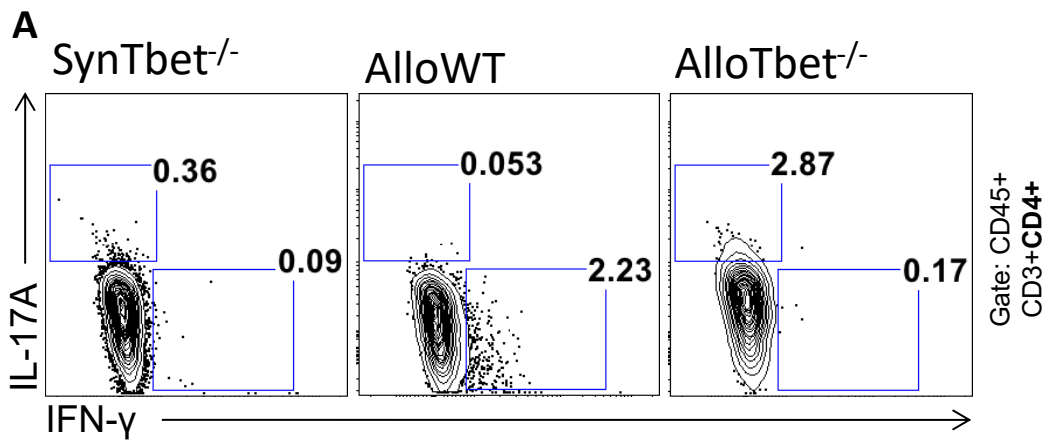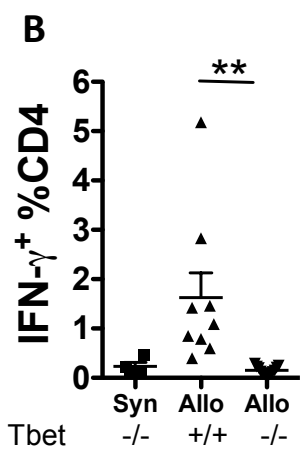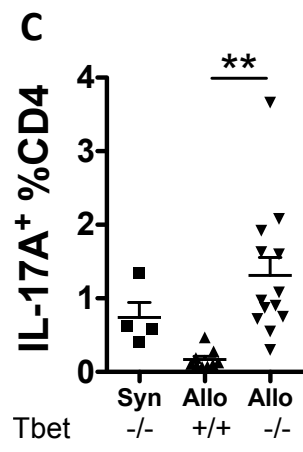

# Supplemental Figure 2

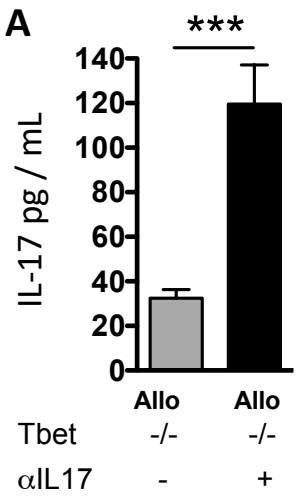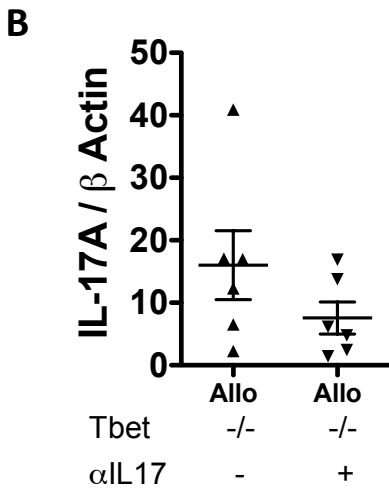

Supplement: NIHMS1634860-supplement-1.pdf [file NIHMS1634860-supplement-1.pdf]
